# Supplementary material for: Liver stiffness measurement predicts clinical outcomes in autoimmune hepatitis
Source: PubMed Central journal article supplement — JHEP Rep. 2024 Sep 6;6(11):101213. doi: 10.1016/j.jhepr.2024.101213 (PMC11550196; doi:10.1016/j.jhepr.2024.101213), 2024-09-06

# **Liver stiffness measurement predicts clinical outcomes in autoimmune hepatitis**

Ignasi Olivas, Pinelopi Arvaniti, Stella Gabeta, Sonia Torres, Maria Del Barrio,  
Alvaro Díaz-González, Paula Esteban, Mar Riveiro-Barciela, Ezequiel Mauro,  
Sergio Rodríguez-Tajes, Kalliopi Zachou, George N. Dalekos, María-Carlota  
Londoño

## Table of contents

|               |    |
|---------------|----|
| Table S1..... | 2  |
| Table S2..... | 4  |
| Table S3..... | 6  |
| Table S4..... | 8  |
| Fig. S1.....  | 9  |
| Fig. S2.....  | 10 |
| Fig. S3.....  | 11 |

**Table S1.** Predictive factors of cirrhosis development during the follow-up in non-cirrhotic patients at baseline treated with azathioprine.

| Variable                         | Cirrhosis development |                   |         | Univariate analysis |                        |         |
|----------------------------------|-----------------------|-------------------|---------|---------------------|------------------------|---------|
|                                  | No (n=197)            | Yes (n=10)        | p value | Wald                | HR (IC 95%)            | p value |
| Age at entry(years)              | 5744-66)              | 56(43-63)         | 0.925   |                     |                        |         |
| Female sex (n, %)                | 145 (87%)             | 11 (61%)          | 0.256   |                     |                        |         |
| AST (U/L)                        | 535 (128 -1064)       | 783 (408-1232)    | 0.195   |                     |                        |         |
| ALT (U/L)                        | 633 (200-1350)        | 821 (415 – 1275)  | 0.526   |                     |                        |         |
| Total bilirubin (mg/dL)          | 2.26 (0.85 – 8.90)    | 7.2 (1.05 – 14.8) | 0.122   |                     |                        |         |
| ALP (x ULN)                      | 1.08 (0.77 – 1.52)    | 1.39 (1 – 2.63)   | 0.044   | 7.894               | 1.970 (1.228 – 3.163)  | 0.05    |
| γ-GT (U/L)                       | 160 (66 – 275)        | 157 (87 – 380)    | 0.416   |                     |                        |         |
| IgG (g/L)                        | 17 (13.9 – 22.1)      | 21 (15.05 – 36.6) | 0.075   |                     |                        |         |
| INR                              | 1.10 (1.03 – 1.22)    | 1.2 (1.01 – 1.28) | 0.415   |                     |                        |         |
| Platelets (x 10 <sup>3</sup> /L) | 227 (176 – 276)       | 200 (147 – 276)   | 0.169   |                     |                        |         |
| mHAI                             |                       |                   |         |                     |                        |         |
| Grade                            | 8 (6 – 11)            | 10.5 (9.5 – 12)   | 0.007   | 2.127               | 1.119 (0.962 – 1.301)  | 0.145   |
| Stage                            | 1(0-1)                | 1 (1-3)           | 0.047   | 3.455               | 1.409 (0.982 - 2.023)  | 0.063   |
| Fibrosis (n, %)                  | 96 (49%)              | 12 (67%)          | 0.075   |                     |                        |         |
| Advanced fibrosis (n, %)         | 14 (7.1%)             | 5 (27.7%)         | 0.002   | 6.572               | 4.318 (1.411 – 13.125) | 0.010   |
| ANA (n, %)                       | 152 (77%)             | 16 (89%)          | 0.277   |                     |                        |         |
| SMA (n, %)                       | 148 (75%)             | 15 (83%)          | 0.476   |                     |                        |         |

|                                     |                    |                      |        |       |                       |        |
|-------------------------------------|--------------------|----------------------|--------|-------|-----------------------|--------|
| Anti-SLA/LP (n, %)                  | 7 (3.6%)           | 1 (5.5%)             | 0.675  |       |                       |        |
| Anti-LKM-1 (n, %)                   | 1 (0.5%)           | 0 (0%)               | 0.756  |       |                       |        |
| BLSM (kPa)                          | 5.3 (4.3 – 7)      | 10.65 (8.65 – 15.93) | <0.001 | 29    | 1.309 (1.187 – 1.443) | <0.001 |
| BR at BLSM (n, %)                   | 164 (83%)          | 10 (56%)             | <0.001 | 7.164 | 0.254 (0.093 – 0.693) | 0.007  |
| Time from diagnosis to BLSM (years) | 2.05 (1.16 – 3.81) | 1.75 (1.25 -5.73)    |        |       |                       |        |

Data are expressed as median (IQR).

Abbreviations: AST, aspartate aminotransferase; ALT, alanine aminotransferase; ALP, alkaline phosphatase;  $\gamma$ -GT,  $\gamma$ -glutamyl transferase; IgG, immunoglobulin G; mHAI, modified hepatitis activity index; ANA, antinuclear antibodies; SMA, smooth muscle antibodies; anti-SLA/LP, anti-soluble liver antigen/liver pancreas antibodies; anti-LKM1, anti-liver kidney microsomal antibodies; Cs, corticosteroids; AZA, azathioprine; MMF, mycophenolate mofetil; BLSM, first liver stiffness measurement after 6 months of treatment initiation; BR, biochemical response.

**Table S2.** Predictive factors of cirrhosis development during follow-up in non-cirrhotic patients at baseline treated with mycophenolate.

| Variable                            | Cirrhosis development |                    |         | Univariate analysis |                        |         |
|-------------------------------------|-----------------------|--------------------|---------|---------------------|------------------------|---------|
|                                     | No (n=102)            | Yes (n=4)          | p value | Wald                | HR (IC 95%)            | p value |
| Age at entry (years)                | 52 (37 – 62)          | 53 (46 - 61)       | 0.696   |                     |                        |         |
| Female sex (n, %)                   | 69 (68%)              | 3 (75%)            | 0.757   |                     |                        |         |
| AST (U/L)                           | 119 (53- 478)         | 498 (139 – 1059)   | 0.214   |                     |                        |         |
| ALT (U/L)                           | 200 (73 – 757)        | 837 (266 – 1441)   | 0.187   |                     |                        |         |
| Total bilirubin (mg/dL)             | 1.06 (0.6 – 3.66)     | 7.65 (1.2 – 13)    | 0.135   |                     |                        |         |
| γ-GT (U/L)                          | 82 (36 - 182)         | 128 (79 -237)      | 0.273   |                     |                        |         |
| IgG (g/L)                           | 15.6 (12 – 20.3)      | 23.6 (14.2 – 38.4) | 0.135   |                     |                        |         |
| INR                                 | 1.05 (0.97 – 1.16)    | 1.45 (1.05 – 1.86) | 0.050   |                     |                        |         |
| Platelets (x 10 <sup>9</sup> /L)    | 233 (192 – 273)       | 222 (66 – 285)     | 0.570   |                     |                        |         |
| mHAI                                |                       |                    |         |                     |                        |         |
| Grade                               | 6 (4 – 8)             | 8 (6 – 13)         | 0.176   |                     |                        |         |
| Stage                               | 1 (1-2)               | 3 (0-4)            | 0.188   |                     |                        |         |
| ANA (n, %)                          | 44 (43%)              | 4 (10%)            | 0.025   |                     |                        |         |
| SMA (n, %)                          | 94 (92%)              | 3 (75%)            | 0.227   |                     |                        |         |
| Anti-SLA/LP (n, %)                  | 11 (11%)              | 0 (0%)             | 0.488   |                     |                        |         |
| Anti-LKM-1 (n, %)                   | 8 (8%)                | 0 (0%)             | 0.560   |                     |                        |         |
| BLSM (kPa)                          | 5.3 (4.4 – 6.8)       | 12.9 (5.9 – 21.7)  | 0.030   | 6.930               | 1.216 (1.051 – 1.406)  | 0.008   |
| BR at BLSM (n, %)                   | 80 (80%)              | 0 (0%)             | 0.000   | 1.084               | 0.003 (0.000- 174.616) | 0.298   |
| Time from diagnosis to BLSM (years) | 2.78 (1.33 – 5.32)    | 1.92 (1.02 – 9.77) | 0.703   |                     |                        |         |

Data are expressed as median (IQR).

Abbreviations: AST, aspartate aminotransferase; ALT, alanine aminotransferase; ALP, alkaline phosphatase;  $\gamma$ -GT,  $\gamma$ -glutamyl transferase; IgG, immunoglobulin G; mHAI, modified hepatitis activity index; ANA, antinuclear antibodies; SMA, smooth muscle antibodies; anti-SLA/LP, anti-soluble liver antigen/liver pancreas antibodies; anti-LKM1, anti-liver kidney microsomal antibodies; Cs, corticosteroids; AZA, azathioprine; MMF, mycophenolate mofetil; BLSM, first liver stiffness measurement after 6 months of treatment initiation; BR, biochemical response.

**Table S3.** Predictive factors of cirrhosis development during the follow-up in patients on BR at the time of BLSM

| Variable                         | Cirrhosis development |                  |         | Univariate analysis |                     |         | Multivariate analysis |                     |         |
|----------------------------------|-----------------------|------------------|---------|---------------------|---------------------|---------|-----------------------|---------------------|---------|
|                                  | No (n=288)            | Yes (n=10)       | p value | Wald                | HR (IC 95%)         | p value | Wald                  | HR (IC 95%)         | p value |
| Age at entry (years)             | 55 (44-66)            | 60 (50-63)       | 0.805   |                     |                     |         |                       |                     |         |
| Females (n, %)                   | 203 (71%)             | 7 (70%)          | 0.974   |                     |                     |         |                       |                     |         |
| AST (U/L)                        | 349 (98-1001)         | 834 (462-1651)   | 0.070   |                     |                     |         |                       |                     |         |
| ALT (U/L)                        | 485 (147-1243)        | 951 (483-1240)   | 0.281   |                     |                     |         |                       |                     |         |
| Total bilirubin (mg/dL)          | 1.8 (0.8-8)           | 12.7 (3.-15.3)   | 0.024   |                     |                     |         |                       |                     |         |
| ALP (x ULN)                      | 0.97 (0.61 – 1.40)    | 1.55 (1.27-3.35) | 0.010   | 7.674               | 1.759 (1.189-2.623) | 0.006   | 7.67                  | 1.762 (1.180-2.631) | 0.006   |
| γ-GT (U/L)                       | 129 (51-253)          | 148 (98-349)     | 0.322   |                     |                     |         |                       |                     |         |
| IgG (g/L)                        | 16.6 (12.8-21)        | 23 (13.4-38.5)   | 0.085   |                     |                     |         |                       |                     |         |
| INR                              | 1.10 (1.00-1.22)      | 1.07 (1.23-1.69) | 0.082   |                     |                     |         |                       |                     |         |
| Platelets (x 10 <sup>9</sup> /L) | 227 (178-275)         | 196 (137-248)    | 0.106   |                     |                     |         |                       |                     |         |
| mHAI                             |                       |                  |         |                     |                     |         |                       |                     |         |
| Grade                            | 8 (6-10)              | 11 (8-11)        | 0.026   | 2.999               | 1.217 (0.974-1.521) | 0.083   |                       |                     |         |
| Stage                            | 0 (0-2)               | 0 (0-2)          | 0.789   |                     |                     |         |                       |                     |         |
| Advanced fibrosis (n, %)         | 31 (10.8%)            | 1 (10%)          | 0.908   |                     |                     |         |                       |                     |         |
| ANA (n, %)                       | 198 (68.9%)           | 9 (90%)          | 0.163   |                     |                     |         |                       |                     |         |
| SMA (n, %)                       | 213 (74.%)            | 9(90%)           | 0.272   |                     |                     |         |                       |                     |         |
| Anti-SLA/LP (n, %)               | 16 (5.6%)             | 1 (10%)          | 0.559   |                     |                     |         |                       |                     |         |
| Anti-LKM-1 (n, %)                | 8 (2.8%)              | 0 (0%)           | 0.587   |                     |                     |         |                       |                     |         |
| Cs + AZA (n, %)                  | 164 (56.9%)           | 8 (80%)          | 0.147   |                     |                     |         |                       |                     |         |

|                                     |                     |                    |       |        |                     |        |        |                      |        |
|-------------------------------------|---------------------|--------------------|-------|--------|---------------------|--------|--------|----------------------|--------|
| Cs + MMF (n, %)                     | 80 (27.8%)          | 0 (0%)             | 0.051 |        |                     |        |        |                      |        |
| BLSM (kPa)                          | 5.1 (4.3-6.8)       | 9.8 (6.43-12.48)   | 0.000 | 18.430 | 1.300 (1.153-1.465) | <0.001 | 12.147 | 1.291 (1.18 – 1.490) | <0.001 |
| ΔLSM (kPa)                          | -0.4 (-1.35 – 0.95) | -0.45 (-5.6 -1.55) | 0.609 |        |                     |        |        |                      |        |
| Time from diagnosis to BLSM (years) | 2.22 (1.24-4.91)    | 2.12 (1.21-6.06)   | 0.909 |        |                     |        |        |                      |        |

Data are expressed as median (IQR).

Abbreviations: AST, aspartate aminotransferase; ALT, alanine aminotransferase; ALP, alkaline phosphatase; γ-GT, γ-glutamyl transferase; IgG, immunoglobulin G; mHAI, modified hepatitis activity index; ANA, antinuclear antibodies; SMA, smooth muscle antibodies; anti-SLA/LP, anti-soluble liver antigen/liver pancreas antibodies; anti-LKM1, anti-liver kidney microsomal antibodies; Cs, corticosteroids; AZA, azathioprine; MMF, mycophenolate mofetil; BLSM, first liver stiffness measurement after 6 months of treatment initiation; BR, biochemical response.

**Table S4.** Variation in liver stiffness measurements during the follow-up in the entire cohort and in different subpopulations.

| Variable                                  | Overall<br>(n=371)   | Cirrhosis at BLSM    |                      | p      | Poor outcomes       |                      | p      | Cirrhosis during follow-up |                      | p      |
|-------------------------------------------|----------------------|----------------------|----------------------|--------|---------------------|----------------------|--------|----------------------------|----------------------|--------|
|                                           |                      | Yes (n=48)           | No (n=323)           |        | Yes (n=5)           | No (n=366)           |        | Yes (n=24)                 | No (n=299)           |        |
|                                           |                      |                      |                      |        |                     |                      |        |                            |                      |        |
| <b>Last LSM (kPa)</b>                     | 5.6 (4.4-7.3)        | 8.8 (6.1 – 14.25)    | 5.3 (4.3 -7.4)       | <0.001 | 17.1 (14 -24.75)    | 5.6 (4.4 -7.23)      | <0.001 | 8.4 (6.85 -14.30)          | 5.3 (4.2 – 6.5)      | <0.001 |
| <b>Δ (kPa)</b>                            | -0.55 (-2 – 0.9)     | -1.4 (-4.05 – 1.00)  | -0.50 (-1.7 – 1.00)  | 0.078  | 1.70 (-4.55 – 4.10) | -0.60 (-2.00 – 0.90) | 0.121  | -0.45 (-5.18 – 5.75)       | -0.5 (-1.6 – 0.83)   | 0.798  |
| <b>ΔLSM/year</b>                          | -0.13 (-0.63 – 0.28) | -0.51 (-1.56 – 0.26) | -0.11 (-0.55 – 0.29) | 0.014  | 0.42 (-1.37 – 1.64) | -0.13 (-0.61 – 0.28) | 0.155  | -0.08 (-0.75 – 1.62)       | -0.11 (-0.54 – 0.26) | 0.478  |
| <b>Time from BLSM to last LSM (years)</b> | 3.50 (1.94-5.78)     | 3.02 (1.82 – 4.81)   | 2.57 (1.94 -5.95)    | 0.211  | 3.46 (2.44 – 4.64)  | 3.51 (1.94 – 5.81)   | 0.774  | 5.11 (2.45 – 7.10)         | 3.52 (1.89 – 5.79)   | 0.052  |

Data are expressed as the median (IQR).

Abbreviations: LSM; liver stiffness measurement; BLSM, first liver stiffness measurement after 6 months of treatment initiation); Δ, variation in LSM from BLSM and last LSM; ΔLSM/year, variation in LSM per year



Fig. S1. Discriminative capacity of platelet count, mHAI, and ALT for predicting poor clinical outcomes.

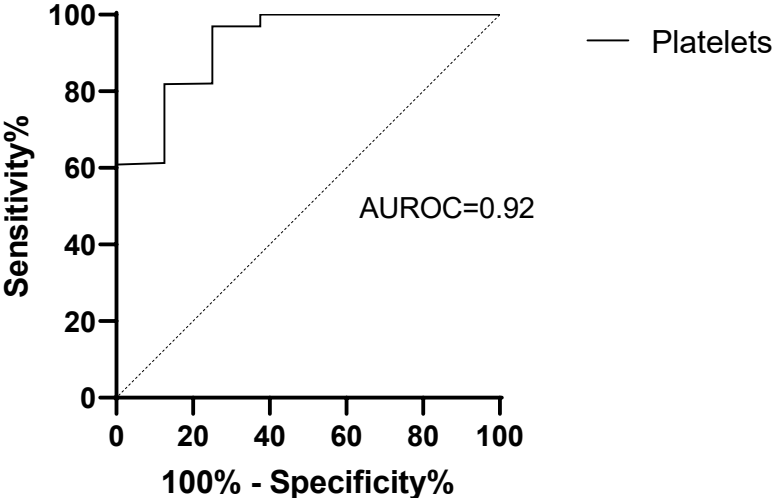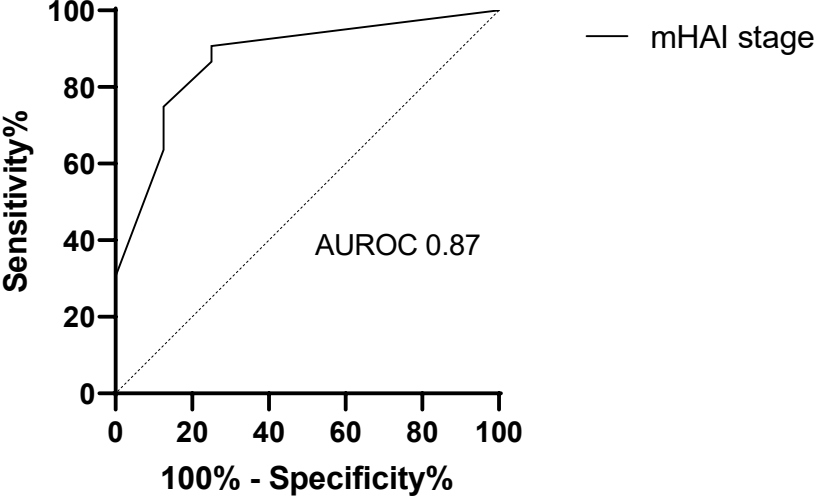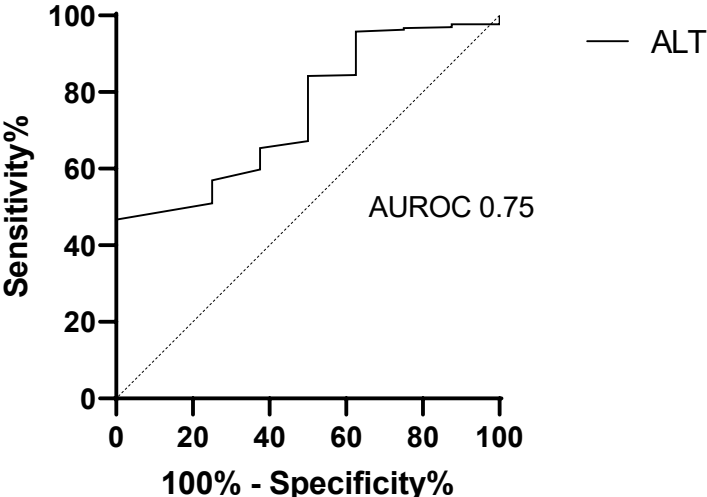

Fig. S2. Lack of impact of time between diagnosis and BLSM and IgG at baseline in the risk of developing cirrhosis.

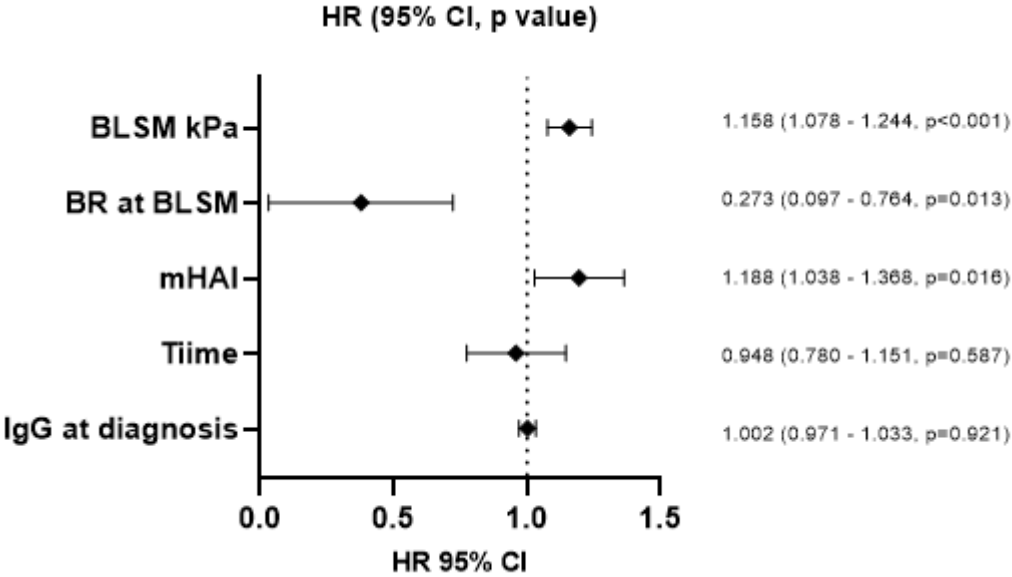

**Fig. S3.** Maximally selected rank statistics confirm the 8.5 kPa cutoff point in the prediction of cirrhosis development.

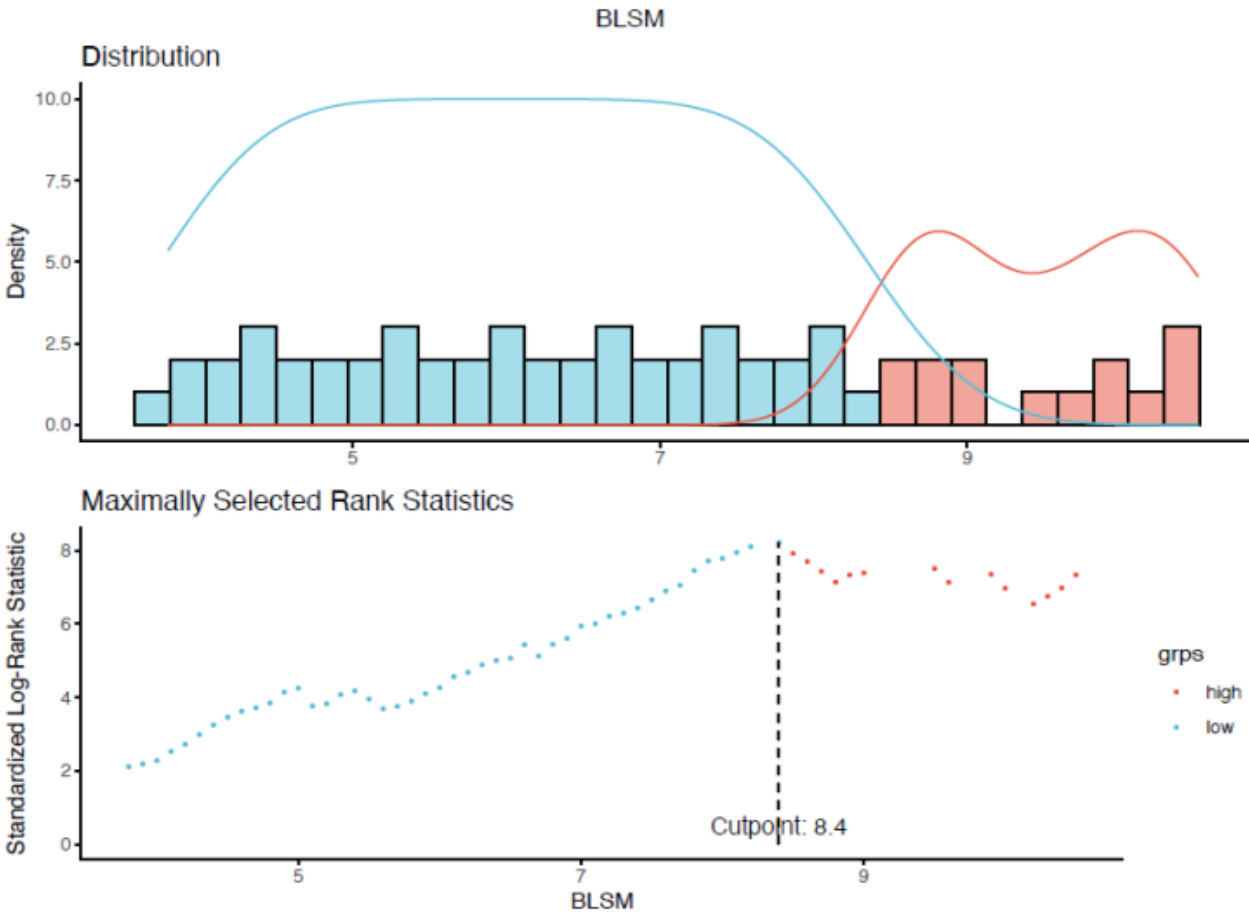

Supplement: mmc1.pdf [file mmc1.pdf]
